# Supplementary material for: Reduction of Hip and Other Fractures in Patients Receiving Teriparatide in Real-World Clinical Practice: Integrated Analysis of Four Prospective Observational Studies
Source: Springer Nature journal article supplement (doi:10.1007/s00223-018-0485-2), 2018-10-20
Supplement: MOESM1 [file 16214450]

**Supplemental Figure 1. Nonvertebral and clinical vertebral fracture rates by 3-month periods.**
